# Supplementary material for: Flagella-Associated WDR-Containing Protein CrFAP89 Regulates Growth and Lipid Accumulation in Chlamydomonas reinhardtii
Source: Front Plant Sci. 2018 May 29;9:691. doi: 10.3389/fpls.2018.00691 (PMC5987165; doi:10.3389/fpls.2018.00691)
Supplement: Supplementary file 1 [file Table_1.docx]

**Supplemental Table S1. Components of stressful mediums.**

| Mediums  Components (mg/L) | **HSM** | **HSM-N** | **HSM-S** | **HSM-Fe** |
| --- | --- | --- | --- | --- |
| Sodium acetate (hydrate) | 2,000 | 2,000 | 2,000 | 2,000 |
| NH4Cl | 500 | - | 500 | 500 |
| NaCl | - | 546.7 | - | - |
| MgSO4·7H2O | 20 | 20 | - | 20 |
| MgCl2.6H2O | - | - | 16.5 | - |
| CaCl2·2H2O | 10 | 10 | 10 | 10 |
| K2HPO4 | 1,440 | 1,440 | 1,440 | 1,440 |
| KH2PO4 | 720 | 720 | 720 | 720 |
| KCl | - | - | - | - |
| NaH2PO4 | - | - | - | - |
| Na2HPO4 | - | - | - | - |
| EDTA-Na2 | 50.0 | 50.0 | 50.0 | 50.0 |
| ZnSO4·7 H2O | 22.0 | 22.0 | 22.0 | 22.0 |
| H3BO3 | 11.4 | 11.4 | 11.4 | 11.4 |
| MnCl2·4 H2O | 5.1 | 5.1 | 5.1 | 5.1 |
| FeSO4·7 H2O | 5.0 | 5.0 | 5.0 | - |
| CoCl2·6 H2O | 1.6 | 1.6 | 1.6 | 1.6 |
| CuSO4•5 H2O | 1.6 | 1.6 | 1.6 | 1.6 |
| (NH4)6 MO7O24·4 H2O | 1.1 | 1.1 | 1.1 | 1.1 |
| Glucose | - | - | - | - |
| Sorbital | - | - | - | - |
